# Supplementary material for: Nitrate uptake by p-phosphonic acid or p-(trimethylammonium)methyl calix[8]arene stablized laminar materials
Source: Royal Society of Chemistry journal article supplement (doi:10.1039/c4ra09000d), 2014-01-01
Supplement: c4ra09000d1.pdf [file c4ra09000d1.pdf]

# Supplementary Information

## Nitrate uptake using *p*-phosphonic acid or *p*- (trimethylammonium)methyl calix[8]arene stabilized lamellar materials

Paul K. Eggers,<sup>a,b</sup> Ela Eroglu,<sup>a,c</sup> Thomas Becker,<sup>d</sup> Xianjue Chen,<sup>b</sup> Kasturi Vimalanathan,<sup>b</sup>  
Keith A. Stubbs,<sup>a</sup> Steven M. Smith,<sup>c</sup> and Colin L. Raston<sup>\*b</sup>

<sup>a</sup> School of Chemistry and Biochemistry, The University of Western Australia, Crawley, WA 6009, Australia

<sup>b</sup> Centre for NanoScale Science and Technology, School of Chemical and Physical Sciences, Flinders University, Bedford Park, SA 5042, Australia [colin.raston@flinders.edu.au](mailto:colin.raston@flinders.edu.au)

<sup>c</sup> ARC Centre of Excellence in Plant Energy Biology, The University of Western Australia, 35 Stirling Highway, Crawley, WA 6009, Australia.

<sup>d</sup> Nanochemistry Research Institute, Curtin University, Kent Street, Bentley, Australia

### 1. Synthesis

#### Preparation of *p*-(dimethylamine)methyl-calix[8]arene

Calix[8]arene (1.0 g, 0.0012 moles) was suspended in DMF (25 mL). Acidic acid (3 mL), 33% dimethylamine in ethanol (2.5 mL) and 37% formaldehyde (1 mL) were then added. The mixture was stirred at room temperature for 24 hrs. The mixture was brought to dryness under reduced pressure and resuspended in MillQ water (15 mL). The solution was then neutralised using 10 % potassium carbonate and the solid was collected by centrifuge at 3000 x g for 10 minutes, resuspended in MillQ water and centrifuged at 3000 x g for 10 minutes, resuspended in methanol and centrifuged at 3000 x g for 10 minutes. The product was then dried under high vacuum (1.06 g, 66 %).

<sup>1</sup>H NMR (DMSO, 600.1 MHz)  $\delta_{\text{H}}$ : 2.13 (s, 48H), 3.26 (s, 16 H), 3.77 (s, 16 H), 6.88 (s, 16H).

<sup>13</sup>C NMR (DMSO, 150.9 MHz)  $\delta_{\text{C}}$ : 33.0 (CH<sub>2</sub>), 44.8 (CH<sub>3</sub>), 63.5 (CH<sub>2</sub>), 126.4 (Cq), 128.9 (Cq), 129.2 (CH), 154.8 (Cq).

#### Preparation of *p*-(trimethylammonium)methyl-calix[8]arene

*p*-(dimethylamine)methyl-calix[8]arene (2.0 g, 0.0015 moles) was suspended in DMF (17 mL). Methyl Iodide (3.0 g, 0.021 moles), in DMF (3 mL) was then added. The mixture was stirred at room temperature for 4 hrs. The solution was then poured into 100 mL of acetone and filtered. The solid was then washed with acetone and allowed to dry (2.84 g, 76 %).

<sup>1</sup>H NMR (DMSO, 600.1 MHz)  $\delta_{\text{H}}$ : 2.93 (s, 72H), 3.85 (s, 16 H), 4.35 (s, 16 H), 7.14 (s, 16H).

<sup>13</sup>C NMR (DMSO, 150.9 MHz)  $\delta_{\text{C}}$ : 32.5 (CH<sub>2</sub>), 51.8 (CH<sub>3</sub>), 68.5 (CH<sub>2</sub>), 117.6 (Cq), 129.1 (Cq), 133.1 (CH), 157.3 (Cq).

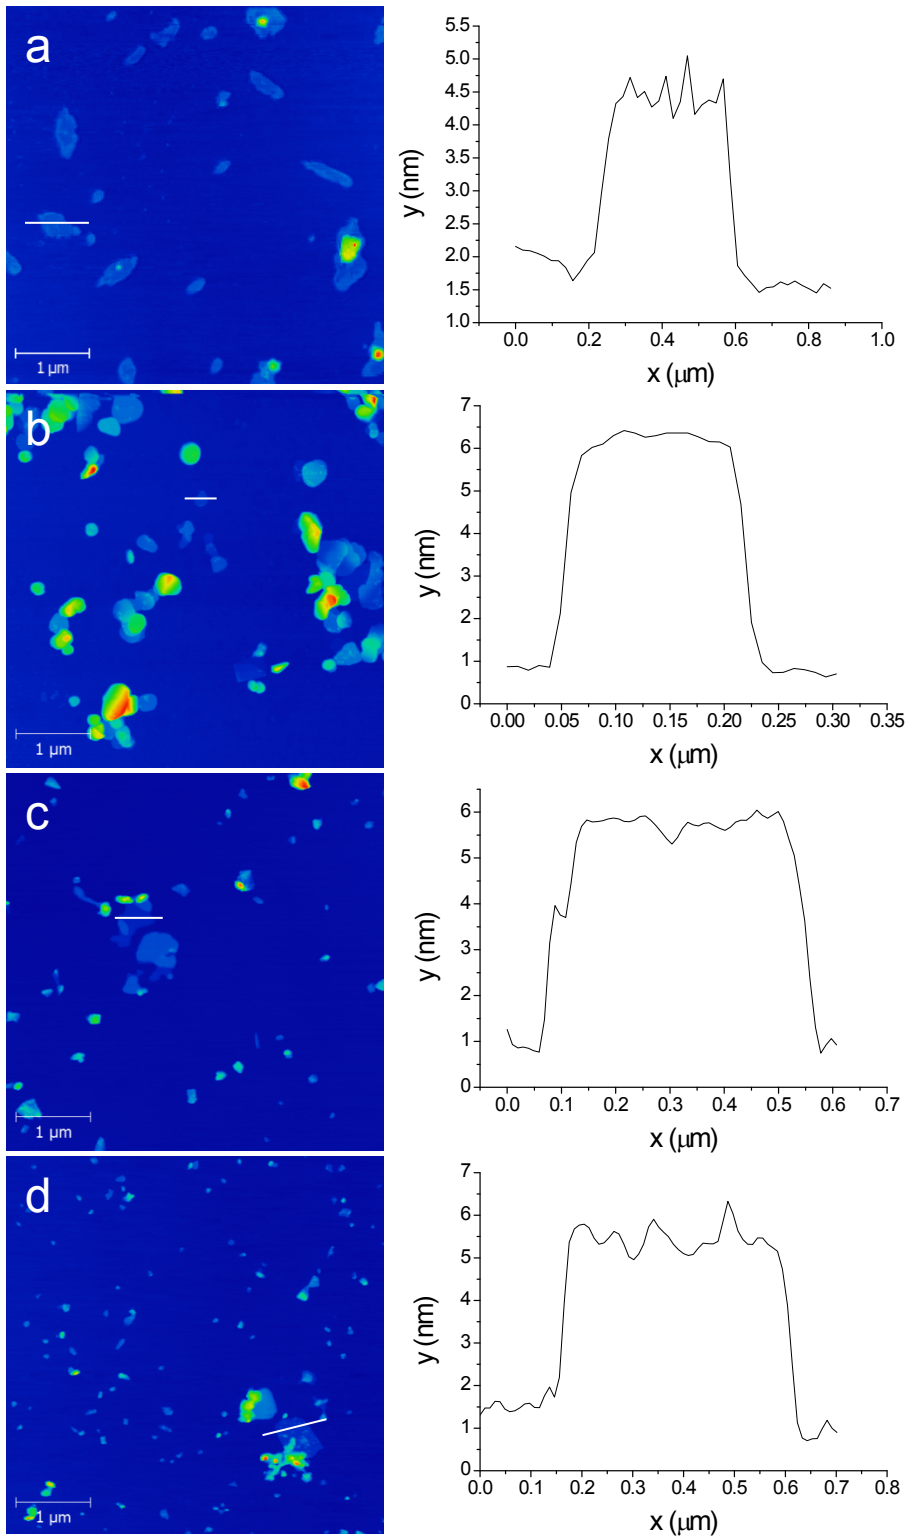

Atomic force microscopy (AFM) images and line profiles of 2D materials exfoliated with *p*-phosphonic acid calix[8]arene. a) Graphene, B) BN, C) MoS<sub>2</sub>, and D) WS<sub>2</sub>.
